# Supplementary material
Source: PubMed Central journal article supplement (PMC2810421)
Supplement: NIHMS148267-supplement-01.pdf [file NIHMS148267-supplement-01.pdf]

## **Supplementary Information**

### **Supplementary Figures**

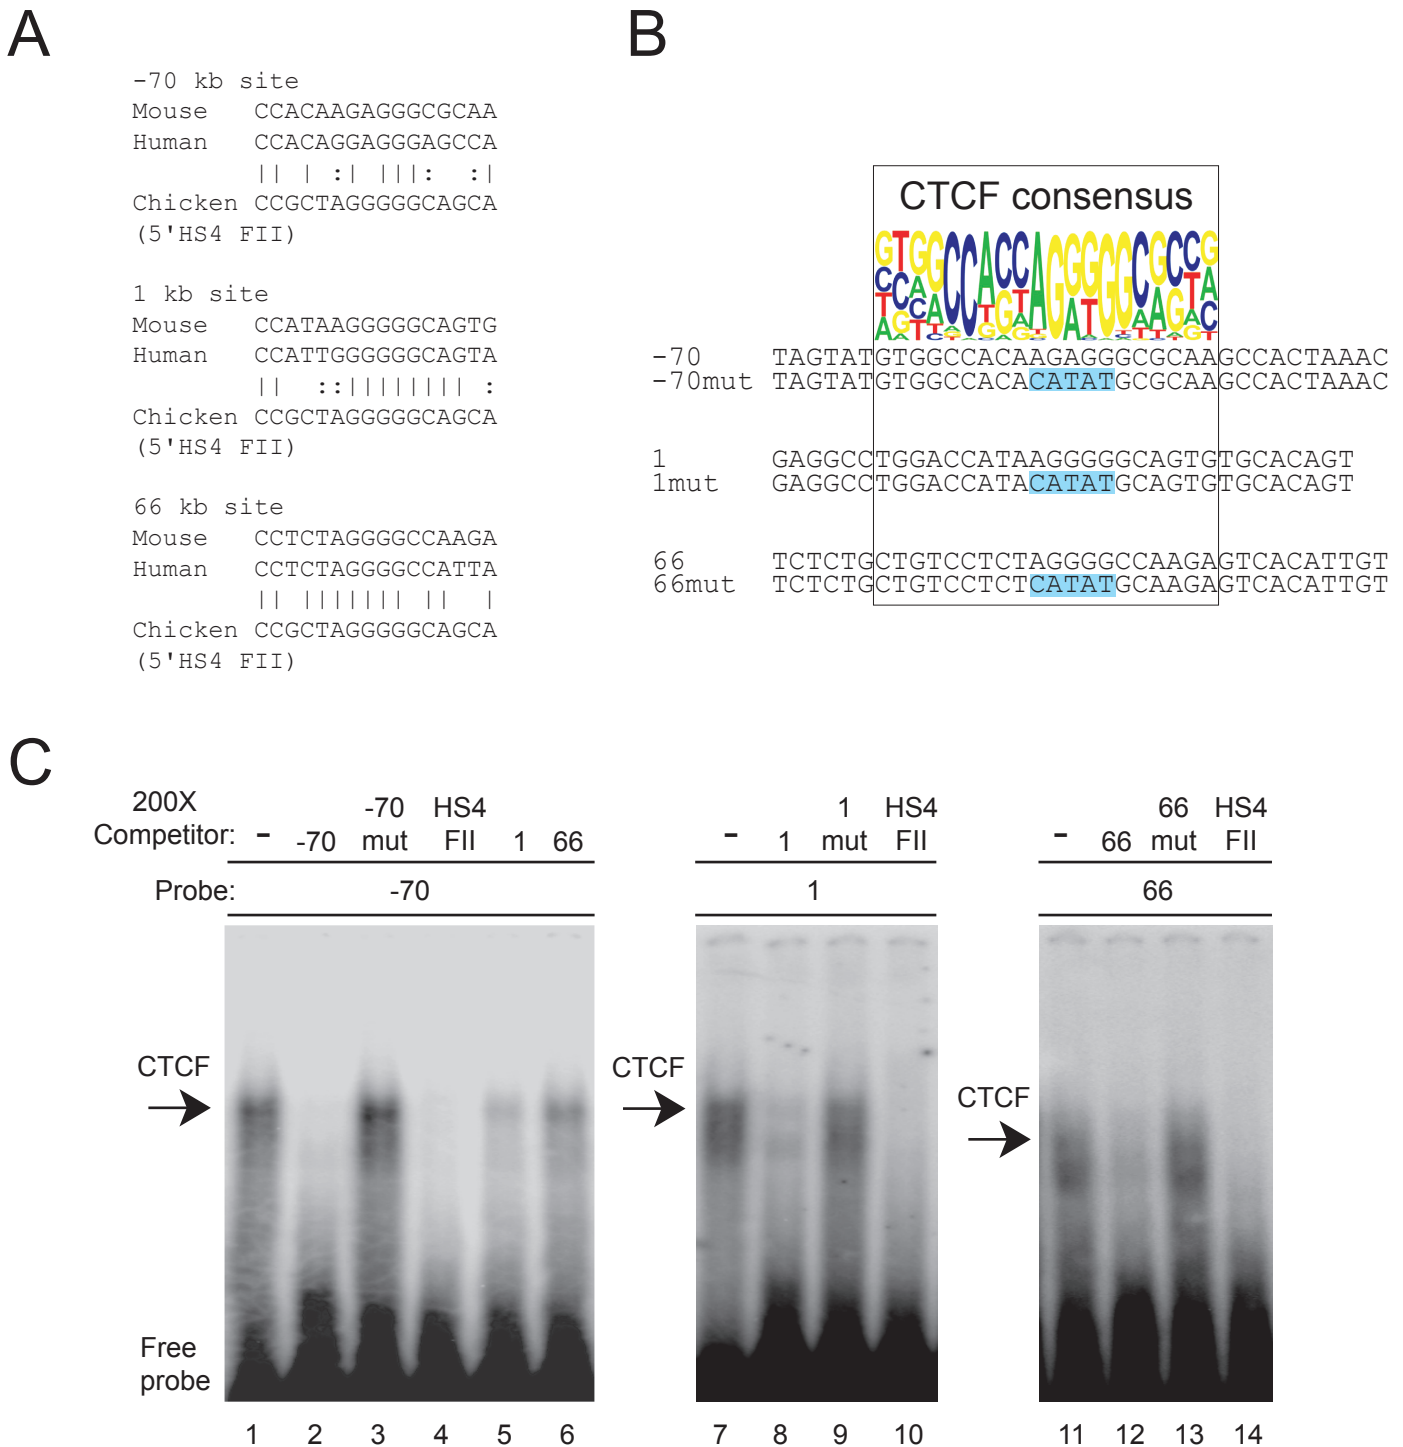

**Supplementary Fig. 1. Electromobility shift assays of CTCF binding to sequences in the *Ifng* locus.**

(A) Alignments of conserved CTCF sites in the *Ifng* locus. Sixteenbases of the Chicken 5'HS4 FII CTCF site are aligned with conserved mouse *Ifng* and human *IFNG* sequences. Vertical lines indicate matches with both the human and mouse sequences, while dots indicate a match with only one of these species. (B) Sequences of the oligonucleotides used for EMSA probes are shown below the 20 bp human CTCF consensus determined by Kim *et al.* (Kim *et al.*, 2007). The CTCF mutants used for mutant EMSA probes are highlighted. (C) EMSA using mouse recombinant CTCF protein and the -70, +1 or +66 kb CTCF-binding sites as probes. In competition assays, a 200-fold molar excess of the indicated wildtype competitor oligonucleotides or mutant oligonucleotides was added to the binding mixture.

CTCF-70 >mm8\_dna range=chr10:117773383-117774057

```

GAGAAGGAAG AATTTAACAT GGAGGGGAAG AGGTGAGCCC TGTGGAGGAC
CCTTGGAGAG TTGCCAGAAA GATAGCTGCT CTGGGTCGTT TAAAATGGGA
ATTTGGAACA TGTCCTCAAT ATTTTCTTCT CATGCAGGAA TCTTCAGTTT
CTGTTCGAT GCATCTCCTC TGTCAGTTTT GGAGCTTTTG TTGGTCTAGC
TCCACCCACA AGGTGGGGCA GTGGTATGCT GAATAGTGTT GCAGTTTAGT
GGCTTGCGCC CTCTTGTTGGC CACATACTAG CATAGCACCG ACCAATCTCC
TTCCACCTCA AGCCTGCTTC GGTAAATTTG TTCCACAAAC CATGGCCAGC
GCTCTGGTAT AAAGCAATTT CCCCGGAAG TAGAACGTCA CAGCATCGGA
CTGATATTTG TATTGCCTCC TCAGGCATTG CGGTGGAAAA TTAGACTCTG
GCTACCTGTT TAATTTCCCT CTGATCATAA GTTTATATTA TTTGACAGAA
AACTTGGTAG CAGTTAAACA TAAATTTTAT TGAGCATTTT CTGTACAAGA
AATTCTTATT TTTATTCGGG TCAGAGAGTA TCAGAGAGAT TTTATAAGAC
ATAGAATGTG GCATTAATTT AATGTTTCCT TGATAAAAAC AGCTACATAG
GGGTAAAACA AACAGTATAT GCTGT

```

CTCF+1 >mm8\_dna range=chr10:117844645-117845247

```

GGGAAACAGC TTATCACTTA AAGTAATGGG AGGCAAAGTT CTTAATGTTT
CTGTTTAAGA AATGCCCCC TCCCCGAAG TTGTTTTACC CTGAGGAGTA
ATTTTGAAAT TCTACTACAA TCGAATCAAA GCCAGCCGCT TGGTGAGGTT
TAATGAGACT CTATATTTCT CAGAGTTTTT AGGATTTTTCT CTTTTGTGAT
TTTTTTTTTA AATTAATGGT TAACAGAAGC AAATTTTATA TCCTTAGAAT
TTTATAATTT GTCCCAAATG TATATACTAG TATACATATA GCTATTAGCA
TAATGTTCAA GCATCTACGG TCAATCCTCT CCTCACAGTG TAAATCAAGC
TGCCCTCCGT ATGTGTTTGG AGCTATTTTT TAAAGTAGCA ATGAAGCCCT
ATTACAGCAC AGACTGATGT TTCAGAGGCC TGGACCATAA GGGGGCAGTG
TGCACAGTGG GATGATTCTA ATGATTTTTCT CTCTCCCTTT CTTAATTTGA
GAGTAAGTTT CTTTTTAGCT CACTATGGTT ACTTGAGGGT ACTTGAACC
TCGTCAGCTT TGTTGAGTTT ATTTGTGGCC TTGCAGTTTC AAGACTGGGC
CAG

```

CTCF+66 >mm8\_dna range=chr10:117910510-117911268

```

GGTCACAGGG AGACAGGGCA GCACAGTCCT TAGCCAAGGT CAACTGGACA
GACCTCCGGT TCCGCCTTCT CAGAAGTGTG TCTCACAGCC ATGCCTGGAT
CCTTCCTATC AGGGCGCCTTG CCCATGTCCT AACTTTCCTG ACACTGATTA
TTGGGGCTAT TATAATGACC TCCCTAACTA CAGTGTGTAA TGTTCTGGT
TCAGCTTCCA TGTTGCTTGG CAAGTAGCAG CTTTCTCCTC ACCTGCTTTC
TCCTTGATAT CTGATACGAA TCTGTCACTG TGCATGCCTG TAATCATCTC
TCTGCTGTCC TCTAGGGGCC AAGAGTCACA TTGTTCCACT TGTATCCCTG
AGGTGGCAGA CAAGAAGTGG GAGAGGCTCA CTTCCAGGAA AGAACTATAC
TGAATGCTGC ACAGCATCCA TGTCCTCTCT TGCCAGGAC AGTCCAGTGA
GGCACTTGTT AGTATTTGCT CCACCTTAAA GATCAGACAG CCAAGTCTGA
AAACTGAGTA CCTTACCCAA GCAATGCCTC ACCCCGTGGA AGGAAGGCAA
GGTAGCCTTG TTTAGAGTTT GTGCTGAGTG ATTTCTCTTT GGTGGAGTGG
GGAAGCGAGG TAGGGTTGGC ATCAGGGCAA AATATGTTTA TTTGCATAAT
TTATTTCTCA AGATGGGTTT TACCTTGAT TTTGCTTACA CACCAGCTGC
CTAACTGGTC TCCGTTGATA GTCTTTTTTC TTCCAAGCT GTTATTCAGG
AGCTAGAGG

```

**Supplementary Fig. 2. Sequence of 3 CTCF binding elements in the mouse *Ifng* locus.**

The CTCF binding sites (yellow) and the CpG dinucleotides (blue) are highlighted, and the annealing sites of the bisulfite sequencing primers (Supplementary Table 8) are underlined.

A

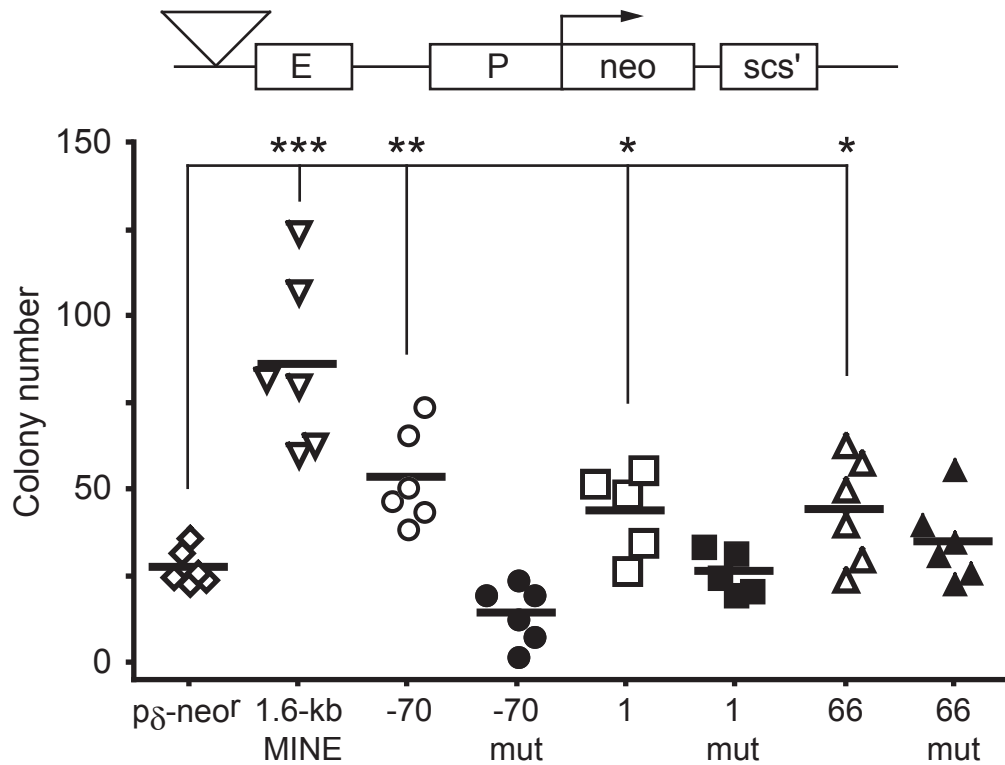

B

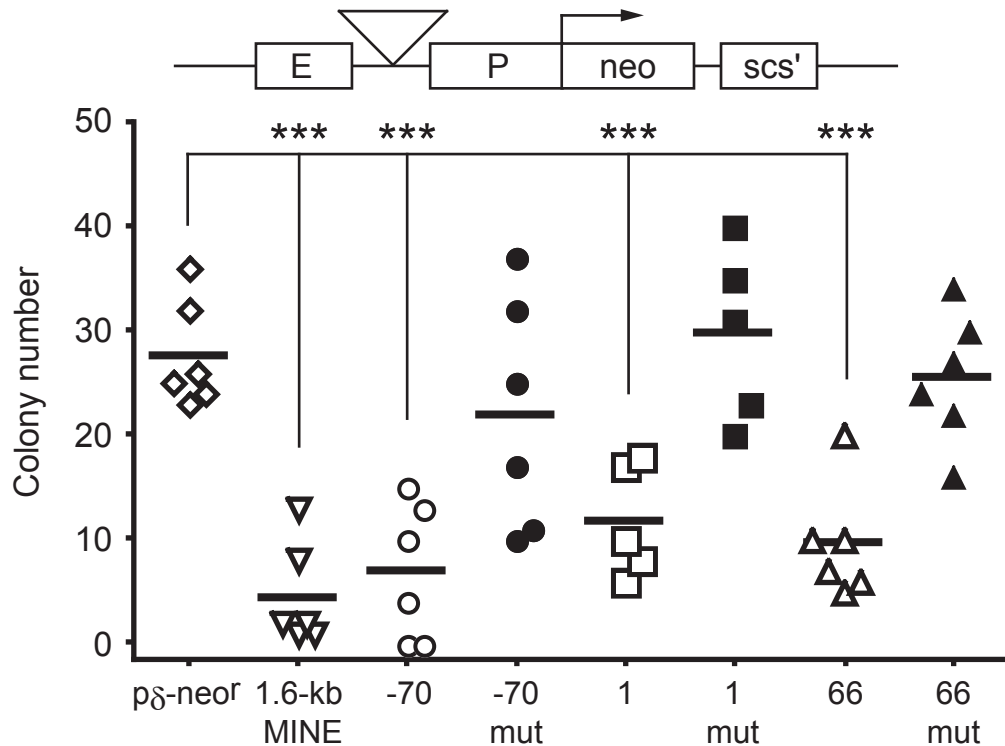

**Supplementary Fig. 3. Insulator function of the CTCF-binding sites.** EL-4 cells were transfected with reporter constructs ( $P_{\delta}$ -neo<sup>r</sup>) containing the bacterial neomycin resistant gene (neo) under control of the promoter (P) and enhancer (E) of the human T cell receptor  $\delta$  gene, flanked 3' by the drosophila insulator element (scs'). The number of G418-resistant colonies was determined by soft agar assay as described (Schoenborn *et al.*, 2007). Positions where test fragments are introduced are marked by triangles. The human *c-MYC* insulator element (1.6-kb MINE) was used as a positive control. The fragments containing mutated CTCF sites (shown in Supplementary Fig. 1B) are shown as filled symbols. (A) Boundary element assay. (B) Enhancer-blocking assay. Small horizontal bars indicate the mean. Data represent a compilation of three independent experiments. \*\*\*,  $p < 0.0008$ , \*\*,  $p < 0.002$ , and \*,  $p < 0.03$ , versus the  $P_{\delta}$ -neo<sup>r</sup> control.

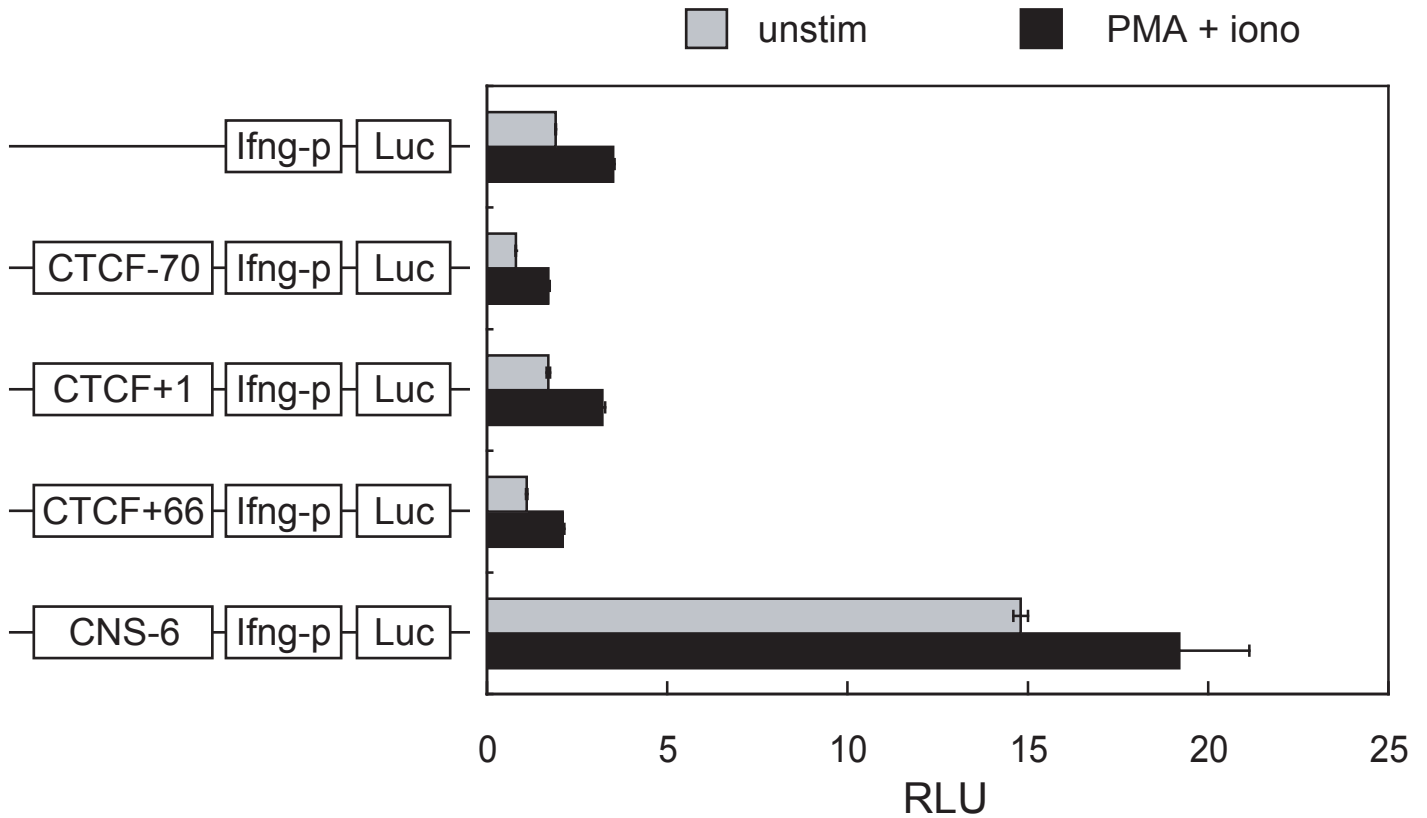

**Supplementary Fig. 4. The CTCF binding elements exhibit no enhancer activity for the *Ifng* promoter.** Luciferase assay of EL-4 cells transfected with reporter constructs containing the *Ifng* promoter and the indicated CTCF binding elements or *Ifng*CNS-6, assessed by dual-luciferase assay in cells unstimulated (gray bars) or stimulated with PMA plus ionomycin (filled bars), presented as firefly luciferase units normalized to renilla luciferase units. Data (mean  $\pm$  s.d. of triplicate samples) are from one representative experiment of three independent experiments.

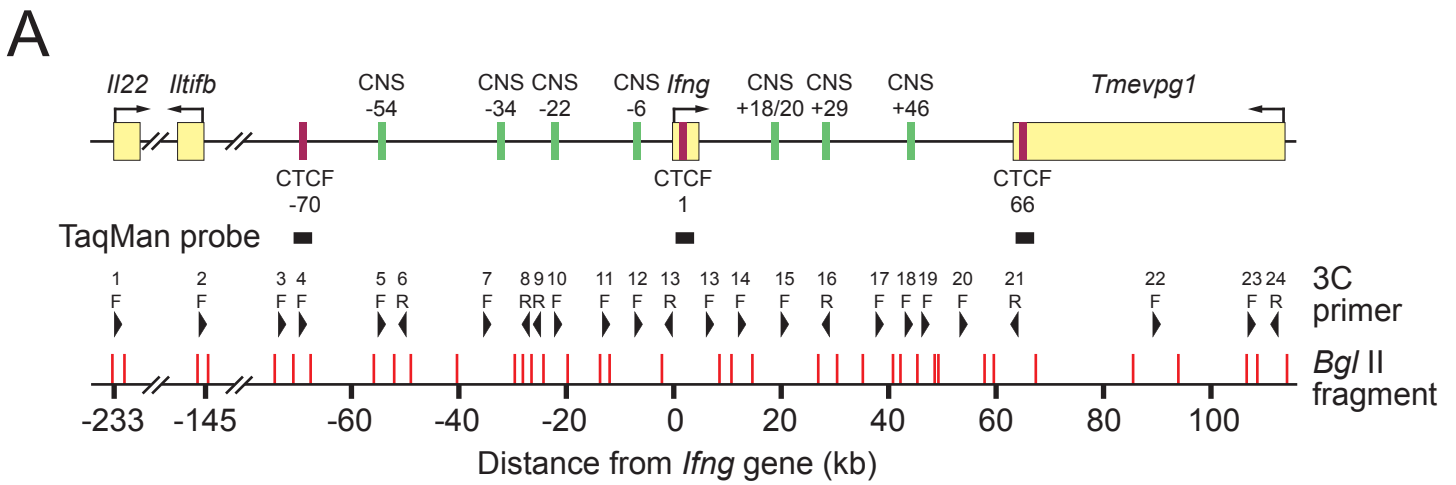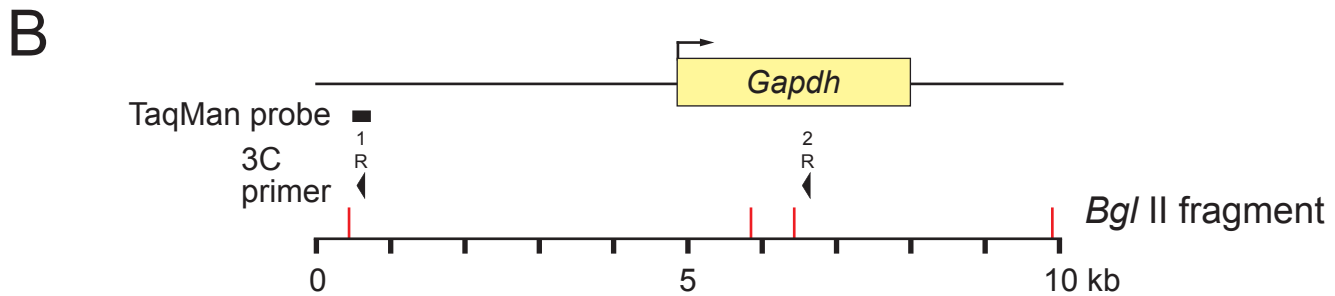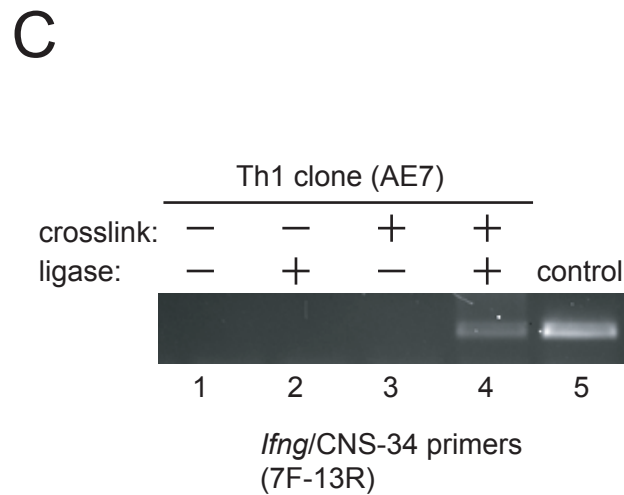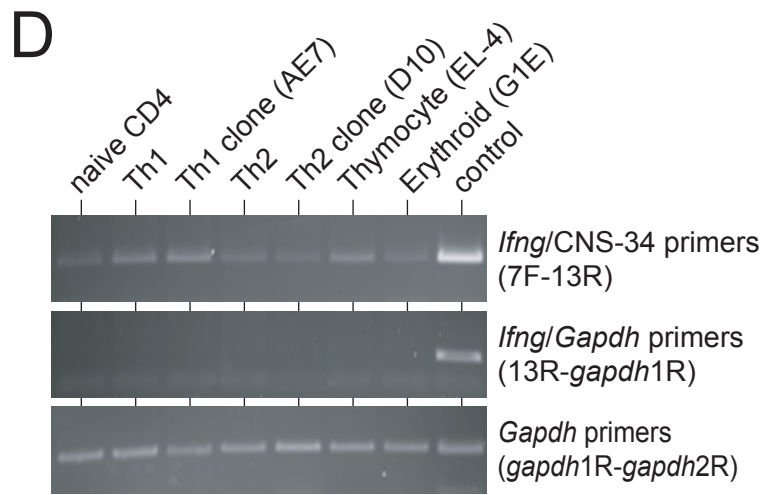

**Supplementary Fig. 5. Strategy used to assess the 3-dimensional conformation of the mouse *Ifng* locus by 3C and examples of control experiments used to validate the specificity of 3C products. (A) *Bgl*II restriction map of the *Ifng* locus spanning a region of 350 kb and a scheme showing positions of regulatory elements. TaqMan probes used for the 3C assay are shown by rectangles. Numbered arrowheads indicate the site and direction of the primers used for the 3C assay. The red vertical lines above the scale show positions of *Bgl*II restriction sites. (B) The *Gapdh* locus. Schematic diagram shows the primers used in the assay and the enzyme sites (red vertical lines). TaqMan probes used for the 3C assay are shown by rectangles. Numbered arrowheads indicate the site and direction of the primers. (C) Example of electrophoretic analyses of 3C PCR products generated using primer pairs for fragments CNS-34 and *Ifng* on non-crosslinked genomic DNA and crosslinked genomic DNA with or without ligation. A 3C product was observed in AE7 Th1 cells when formaldehyde crosslinking and T4 DNA ligase were included during the assay (lane 4) and in the positive control consisting of ligated BAC DNA (lane 5). There are no random intramolecular ligation products without formaldehyde crosslinking and T4 DNA ligase (lanes 1-3). (D) Example of electrophoretic analysis of 3C PCR products using primer pairs for fragments containing CNS-34 and *Ifng* using as templates DNA from the cell types shown or control BAC DNA (top). Primer pairs for the *Ifng* CNS-34 fragment and one of the *Bgl*II *Gapdh* fragments resulted in no product (middle). *Gapdh* products obtained with primer pairs for the two *Bgl*II fragments on the *Gapdh* locus were used for normalizing signals (bottom).**

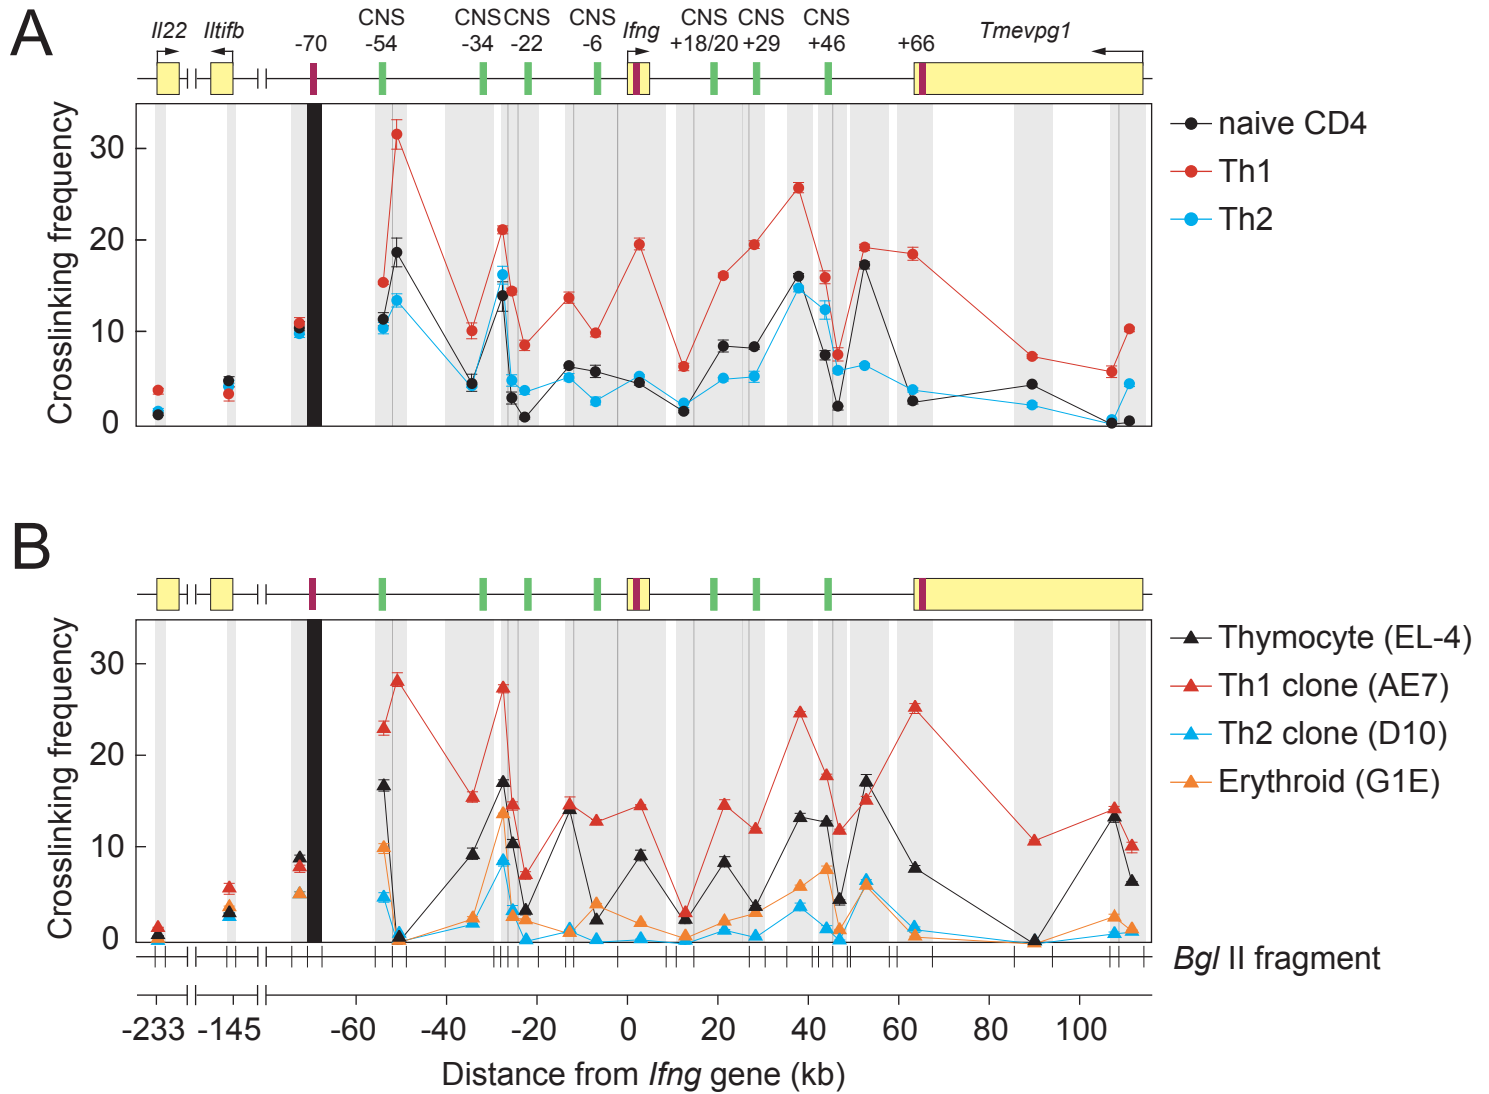

**Supplementary Fig. 6. 3C assay results using the -70kb CTCF element as anchor fragment.** Relative cross-linking frequencies were measured between a fixed anchor fragment bearing the -70kb CTCF binding site and other *Bgl*II fragments on primary CD4<sup>+</sup> T cells (A) and mouse cell lines (B). The format of the figure panels and methods of assessment are as in Fig. 3.

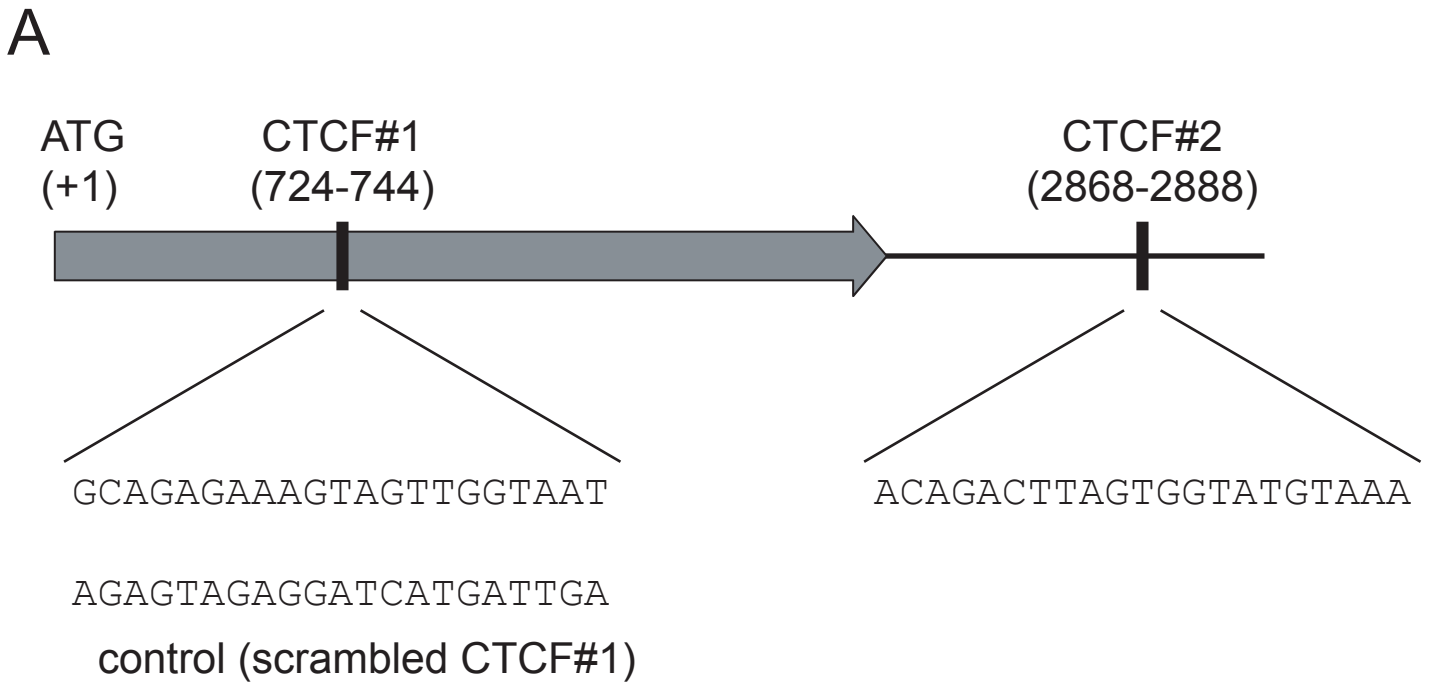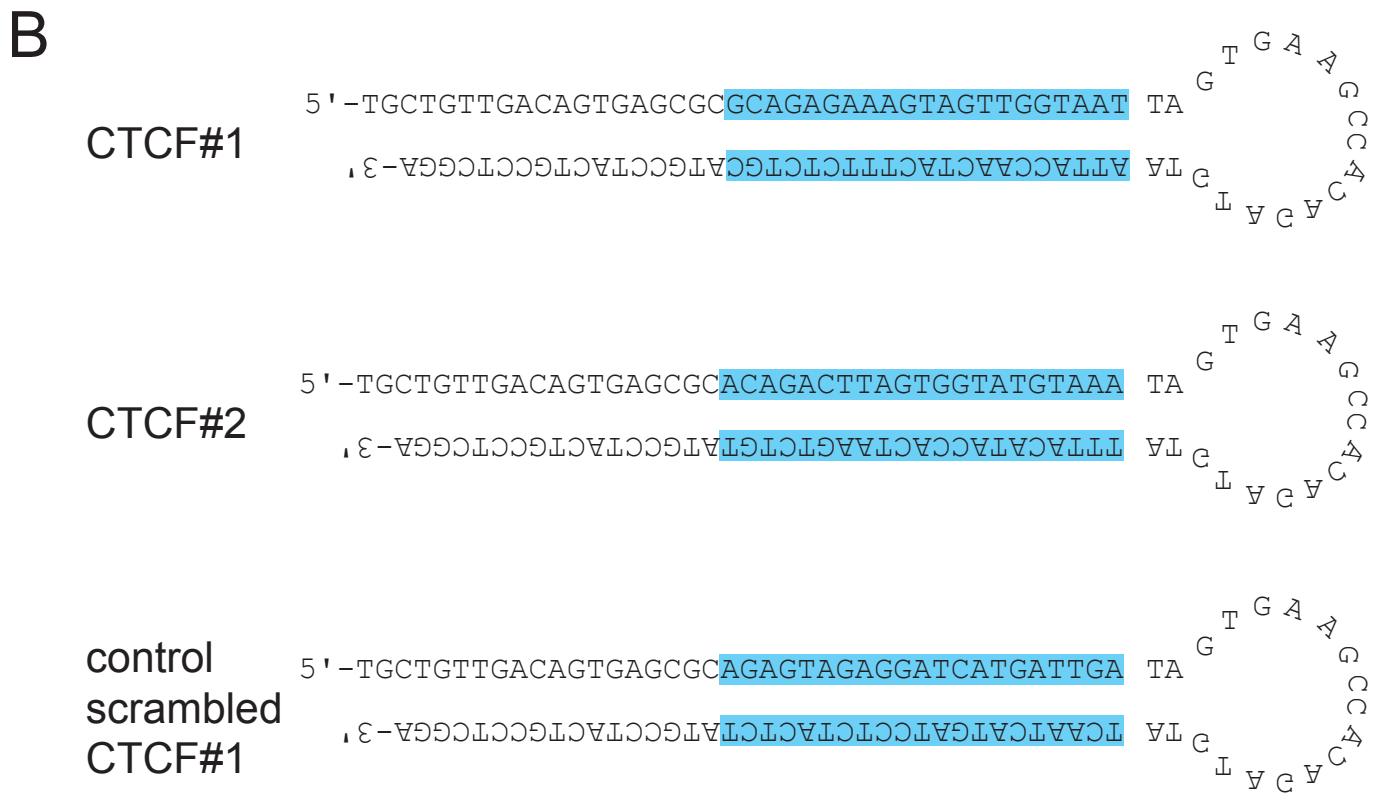

**Supplementary Fig. 7. miR-30 based shRNA design for CTCF knockdown.** (A) Schematic representation of CTCF hairpin targeting sequences (CTCF#1 and CTCF#2) and the control, which consisted of scrambled CTCF#1 sequence. Numbers represent the nucleotide positions of cDNA relative to the *Ctcf* translation start site. (B) Hairpin representations of the targeting sequences. The sense and antisense strands of the CTCF targeting sequences are highlighted on the hairpins.



## SUPPLEMENTARY TABLES

### Supplementary Table 1

#### Primers used for 3C assay

| Location* | Name             | Primer sequence (5' to 3') | mm8 coordinates            |
|-----------|------------------|----------------------------|----------------------------|
| -235      | 1F               | GGATGAGAAAGATGTTGGAAC      | chr10: 117609108-117609129 |
| -145      | 2F               | GACACTGGAGAAAGGGCTCA       | chr10: 117698571-117698590 |
| -71       | 3F               | AGGACCTATACGCTGGCAGT       | chr10: 117772724-117772743 |
| -69       | 4F (anchor)      | GCCCATACAGACTTTGAAGC       | chr10: 117775291-117775310 |
| -53       | 5F               | AATGGTTCAGGTCTGGTTGA       | chr10: 117791193-117791212 |
| -51       | 6R               | TCATAGCCCATATTTCCAG        | chr10: 117792885-117792904 |
| -30       | 7F               | GAGAGTGTGGGCTCCCTTCT       | chr10: 117813682-117813701 |
| -28       | 8R               | GAGACACCTCCACTCTGCAT       | chr10: 117816479-117816498 |
| -27       | 9R               | GCTTCTCTAATGAACTGTAATGTGC  | chr10: 117817149-117817173 |
| -24       | 10R              | GCTTTGATCATAGCTTCATTATC    | chr10: 117819704-117819726 |
| -12       | 11F              | TACACTATTCTGCCTGGT         | chr10: 117832272-117832291 |
| -3        | 12F              | AGAATGTGCCATTAGAAGTC       | chr10: 117841486-117841505 |
| 2         | 13R (anchor)     | CAGATGTAAGATGGGATCTC       | chr10: 117841650-117841669 |
| 7         | 13F (anchor)     | GTGTATGCTCCGTGGCTAGT       | chr10: 117850802-117850821 |
| 15        | 14F              | GAAGCCTGTAGGGGAGAGAC       | chr10: 117859041-117859060 |
| 27.8      | 15F              | AGAATCTGGCCTGTGATTG        | chr10: 117871836-117871855 |
| 27.9      | 16R              | TGAGCTCCAAACCTCTGTTC       | chr10: 117871988-117872007 |
| 41        | 17F              | GGTTTAGGAAAGCATTGTCTG      | chr10: 117884890-117884911 |
| 48        | 18F              | CCTGGGTCTTTGTATGGTCTT      | chr10: 117891637-117891657 |
| 51        | 19F              | GACCCATAGCTCTGCCTCT        | chr10: 117895490-117895509 |
| 63        | 20F              | GACATGTCTGTGTTGTGTTC       | chr10: 117907377-117907397 |
| 66        | 21R (anchor)     | CCTCTGACAAAATCTGCCTCT      | chr10: 117910402-117910421 |
| 98        | 22F              | CACTGAGGAGCCACCAGTAA       | chr10: 117941599-117941618 |
| 111.2     | 23F              | GTCCATCCTCTGCCTCAGTA       | chr10: 117955258-117955277 |
| 111.3     | 24R              | CTGGTGAATCTTCCACCTA        | chr10: 117955400-117955419 |
|           | Gapdh1R (anchor) | ACACAGGCCAAAATACCAATG      | chr6: 125135230-125135249  |
|           | Gapdh2R          | GAATGCTTGGATGTACAACC       | chr6: 125129297-125129316  |

\*Location corresponds to the distance in kilobases from *Irfng* transcription start site (chr 10: 177844040 UCSC mm8, UCSC Genome Browser: <http://www.genome.ucsc.edu/>). F or R designate forward or reverse primers as compared to direction of *Irfng* gene or *Gapdh* gene transcription.

### Supplementary Table 2

#### TaqMan probes used for 3C assay

| Name      | Probe sequence (5' to 3')                      |
|-----------|------------------------------------------------|
| IFNG13R   | 6FAM-CCATAGTGAAAAGTCACATGGCTGAGAAACACTTC-TAMRA |
| IFNG13F   | 6FAM-AGATCTCTCAGACTGACTGAGCC-TAMRA             |
| GAPDH1R   | 6FAM-AGATCTTAATTCTGGTCCCTT-TAMRA               |
| -70CTCF4F | 6FAM-AGTCACGTGGCCTGCCGTCCCTAC-TAMRA            |
| 66CTCF21R | 6FAM-AACATAGTAAGTGGGCCTATACCTGTGCC-TAMRA       |

Probe names are assigned as in Supplementary Table 1.

### Supplementary Table 3

#### Oligonucleotides used for shRNA retroviral construction

| Name                | Sequence (5' to 3')                                                                                    |
|---------------------|--------------------------------------------------------------------------------------------------------|
| CTCF#1              | TGCTGTTGACAGTGAGCGCGCAGAGAAAAGTAGTTGGTAATTAGTGAAGCCACAGATGTAATTA<br>CCAACTACTTTCTCTGCATGCCTACTGCCTCGGA |
| CTCF#2              | TGCTGTTGACAGTGAGCGAACAGACTTAGTGGTATGTAAATAGTGAAGCCACAGATGTATTTAC<br>ATACCACTAAGTCTGTGTGCCTACTGCCTCGGA  |
| scrambled<br>CTCF#1 | TGCTGTTGACAGTGAGCGCAGAGTAGAGGATCATGATTGATAGTGAAGCCACAGATGTATCAA<br>TCATGATCCTCTACTCTATGCCTACTGCCTCGGA  |
| mir30-f             | CAGAAGGCTCGAGAAGGTATATTGCTGTTGACAGTGAGCG                                                               |
| mir30-r             | CTAAAGTAGCCCCTTGAATTCGAGGCAGTAGGCA                                                                     |

### Supplementary Table 4

#### Primer sequences used for gene expression analysis

| Name    | Primer sequence (5' to 3') |
|---------|----------------------------|
| CTCF-f  | GACCACAAATCTAGAACCAAAGAAC  |
| CTCF-r  | GTTGGCTTCGGAGGCTTCATATTACC |
| actin-f | TCCTTCGTTGCCGGTCCAC        |
| actin-r | ACCAGCGCAGCGATATCGTC       |

### Supplementary Table 5

#### Probes used for EMSA

| Name        | Probe sequence (5' to 3')                  |
|-------------|--------------------------------------------|
| HS4FII      | CCCAGGGATGTAATTACGTCCCTCCCCCGCTAGGGGGCAGCA |
| CTCF-70     | TAGTATGTGGCCACAAGAGGGCGCAAGCCACTAAAC       |
| CTCF-70mut* | TAGTATGTGGCCACACATATGCGCAAGCCACTAAAC       |
| CTCF1       | GAGGCCTGGACCATAAGGGGGCAGTGTGCACAGT         |
| CTCF1mut*   | GAGGCCTGGACCATACATATGCAGTGTGCACAGT         |
| CTCF+66     | ACAATGTGACTCTTGGCCCCTAGAGGACAGCAGAGA       |
| CTCF+66mut* | ACAATGTGACTCTTGCATATGAGAGGACAGCAGAGA       |

\* Oligonucleotides are also used to change the CTCF-binding sites of boundary element constructs.

### Supplementary Table 6

#### Primers used to generate luciferase-reporter constructs

| CTCF element | Primer sequence (5' to 3')           |
|--------------|--------------------------------------|
| CTCF-70      | F: TGGGTACCTTTGTTGGTCTAGCTCCACCC     |
|              | R: TTCTCGAGTTAACTGCTACCAAGTTTCTG     |
| CTCF+1       | F: TGGGTACCTAGCATAATGTTCAAGCATCTACGG |
|              | R: TTCTCGAGAGTCTTGAAACTGCAAGGCCACA   |
| CTCF+66      | F: TGGGTACCATTTGGGGCTATTATAATGACC    |
|              | R: TTCTCGAGCAGACTTGGCTGTCTGATCTTT    |

## Supplementary Table 7

### Primers used to generate boundary element constructs

| Region  | Element          | Primer sequence (5' to 3')            |
|---------|------------------|---------------------------------------|
| CTCF-70 | Insulator        | F: TTGCGGCCGCTTTGTTGGTCTAGCTCCACCC    |
|         |                  | R: TTTCTAGATTAAGTCTACCAAGTTTTCTG      |
| CTCF-70 | Enhancer Blocker | F: CAATCGATTTGTTGGTCTAGCTCCACCC       |
|         |                  | R: GGGTCGACTTAACTGCTACCAAGTTTTCTG     |
| CTCF+1  | Insulator        | F: CGCGGCCGCTAGCATAATGTTCAAGCATCTACGG |
|         |                  | R: TTCTAGAAGTCTTGAAACTGCAAGGCCACA     |
| CTCF+1  | Enhancer Blocker | F: CCATCGATAGCATAATGTTCAAGCATCTACGG   |
|         |                  | R: TTGTCGACAGTCTTGAAACTGCAAGGCCACA    |
| CTCF+66 | Insulator        | F: CGCGGCCGCATTGGGGCTATTATAATGACC     |
|         |                  | R: TTCTAGACAGACTTGGCTGTCTGATCTTT      |
| CTCF+66 | Enhancer Blocker | F: CCATCGATTGGGGCTATTATAATGACC        |
|         |                  | R: TTGTCGACAGACTTGGCTGTCTGATCTTT      |

## Supplementary Table 8

### BIS-PCR primers used for CpG methylation analysis

| Region  | mm8 Begin | mm8 End   | Forward     | Reverse     |
|---------|-----------|-----------|-------------|-------------|
| CTCF-70 | 117773383 | 117774057 | BISCTCF-70F | BISCTCF-70R |
| CTCF+1  | 117844645 | 117845247 | BISCTCF+1F  | BISCTCF+1R  |
| CTCF+66 | 117910510 | 117911268 | BISCTCF+66F | BISCTCF+66R |

#### Sequence of BIS-PCR primers

| Name        | Primer sequence (5' to 3')         |
|-------------|------------------------------------|
| BISCTCF-70F | GAGAAGGAAGAATTTAATATGGAGGGGAAGAGG  |
| BISCTCF-70R | ACAACATATACTATTTATTTTACCCCTATA     |
| BISCTCF+1F  | GGGAAATAGTTTATTATTTAAAGTAATGGGAGGT |
| BISCTCF+1R  | CTAACCCAATCTTAAACTACAAAACCAC       |
| BISCTCF+66F | GGTTATAGGGAGATAGGGTAGTATAGTTTTTAGT |
| BISCTCF+66R | CCTCTAACTCCTAAATAACAACCTA          |

## Supplementary Table 9

### Primers used for Chromatin Immunoprecipitation (ChIP) assay

#### Mouse

| Location* | Forward Primer (5' to 3') | Reverse Primer (5' to 3') | UCSC mm8 coordinates |
|-----------|---------------------------|---------------------------|----------------------|
| -70488    | CTGTCAGTTTTGGAGCTTTTGTG   | GCAATACAAATATCAGTCCGATGC  | 117773552-117773798  |
| -21836    | GGTGATCCACAGGAAGGAGA      | GAGCAGAAATTTGGCCTCTT      | 117822204-117822316  |
| -49       | GAGGAGCCTTCGATCAGGTA      | CAAGTCAGAGGGTCCAAAGG      | 117843991-117844101  |
| 993       | CAATGAAGCCCTATTACAGCACAG  | TCTTTTAGCTGCAGGATGTACTGG  | 117845033-117845267  |
| 18436     | TGGTCCCATACTGTGAGTATTTG   | TAAGACCACACCTCCACATAGTGC  | 117862476-117862727  |
| 29855     | CGCTCAGTATACAGCCAGTCACTT  | AAGCTCTAGCTGCCCTGATTA AAA | 117873895-117874147  |
| 66684     | GCTTGCAAGTAGCAGCTTT       | GGAAGTGAGCCTCTCCCACT      | 117910724-117910894  |

\* Relative to the mouse *Ifng* transcription start site (chr10: 177844040 UCSC mm8)

#### Human

| Location* | Forward Primer (5' to 3') | Reverse Primer (5' to 3') | UCSC hg17 coordinates |
|-----------|---------------------------|---------------------------|-----------------------|
| -63648    | TCCTAAAGTGGGTGGGACAG      | TTACCCCAGGGCATAAACTG      | 66903218-66903436     |
| -31       | AAAATGGAAGTGCCAACGAT      | TGGTTTTGCATTCAGCACTT      | 66869952-66870153     |
| -22       | AACCATGGCTGAACTTCCTG      | GGTGTAGACGGCCTAGAGCA      | 66860708-66860857     |
| -16       | GGGAGAAGAGCGATTCCTT       | CAAGGTGCCTTCCATCTCTC      | 66855735-66855900     |
| -4        | TCTCCGTAGGTTTGGCTTG       | CCTTGGTTTCCCTTTCTCTC      | 66843940-66844119     |
| -16112    | GGGAGAAGAGCGATTCCTT       | CAAGGTGCCTTCCATCTCTC      | 66855735-66855900     |
| 1069      | ACCCTACAGGAAGGCACAGT      | TGATACTCCAAGGTCCCAAA      | 66838559-66838719     |
| 22        | ATTTCACACTGCTCACCAA       | TCTACCGCTTCCCACTGAC       | 66817457-66817635     |
| 39728     | ACCCGAGAAGATGCCTACCT      | CCACTTCCATCCAGTGCTTT      | 66799811-66800060     |
| 80        | AAACATGGGAAGGGGAAACT      | ACCAGCCCACCACTACAGAG      | 66760806-66761006     |
| 119009    | GATTCACAGTGCCTTCTCC       | CCCCAAGCATAAAGGATCT       | 66720638-66720779     |

\* Relative to the human *IFNG* transcription start site (chr12: 66839788 UCSC hg17)

## Supplementary Table 10

### Primers used to generate a bacterial expression vector for the recombinant CTCF protein

| Name       | Primer sequence (5' to 3')      |
|------------|---------------------------------|
| CTCFzf11-f | AGGGATCCAAAAAGGTGTAAAGAAAACATTC |
| CTCFzf11-r | GGGAGCTCTTTCCCTCTACGCCATCTG     |
